# Supplementary material for: Lithium-mediated protection of hippocampal cells involves enhancement of DNA-PK–dependent repair in mice
Source: JCI journal article supplement (doi:10.1172/jci34051), 2009-03-26

## Supplement

### Supplemental Figure 1

Lithium does not affect cell cycle distribution in hippocampal neurons. HT-22 cells were treated with vehicle or 3mM lithium for **(A)** 7 or **(B)** 8 days. Following the treatment period, cell cycle distribution was determined using standard ethanol fixation and propidium iodide staining followed by flow cytometry as previously described (S1).

S1. Zhang, J., et al. 2004. Chk2 phosphorylation of BRCA1 regulates DNA double-strand break repair. *Mol. Cell. Biol.* **24**:708–718.

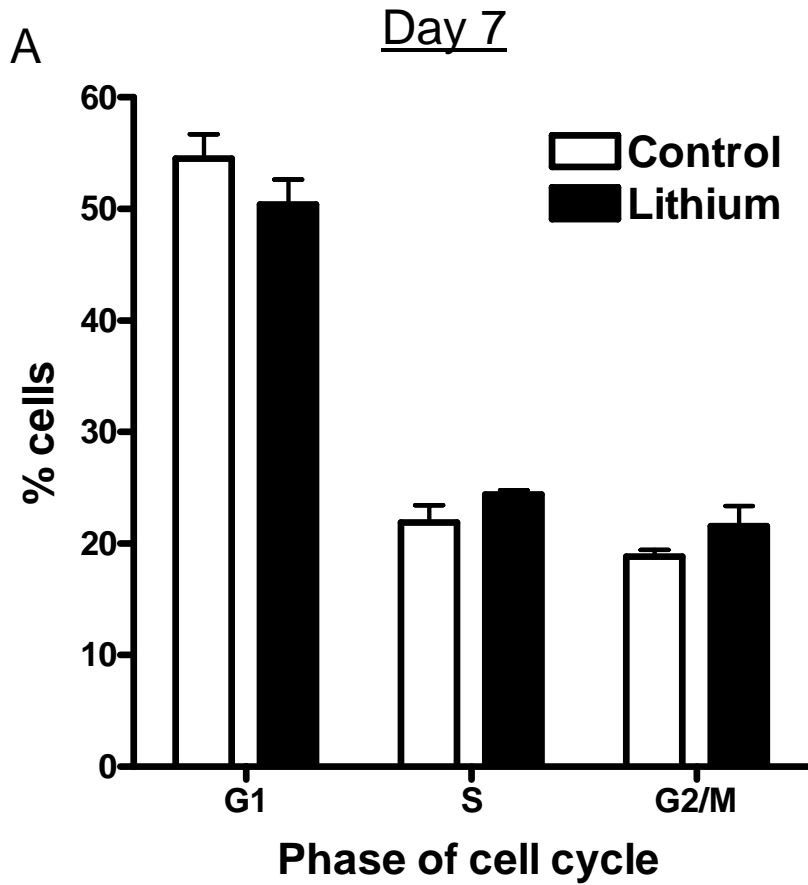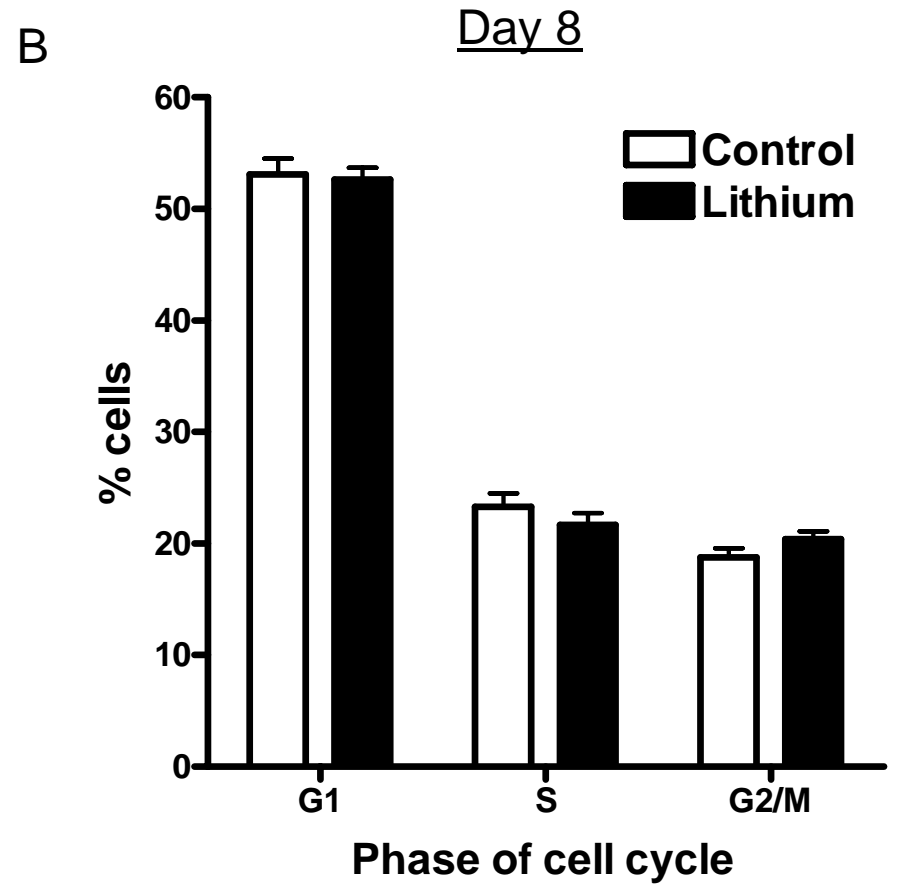

Supplement: sd1 [file 1]
